# Supplementary material for: Clinical course of hospitalizations with Influenza, SARS-CoV-2 and respiratory syncytial virus (RSV) infections in the season 2024/2025 in a large German primary care centre and comparison with the previous two years
Source: Research Square preprint supplement (doi:10.21203/rs.3.rs-8402845/v1), 2026-01-09
Supplement: Supplementary file 1 [file 1708ba522555d02c753dd9b7.docx]

**Supplemental Table S1:** Prevalence of symptoms in patients ≥ 18 years of age

|  | **SARS-CoV-2** | **Influenza A** | **Influenza B** | **RSV** | **P value** |
| --- | --- | --- | --- | --- | --- |
| **n** | 248 | 212 | 16 | 34 | - |
| **Cough** | 160 (64.5%) | 169 (79.7%) | 10 (62.5%) | 27 (79.4%) | 0.002 |
| **Dyspnoea** | 111 (44.8%) | 95 (44.8%) | 4 (25.0%) | 21 (61.8%) | 0.095 |
| **Fever** | 116 (46.8%) | 100 (47.2%) | 11 (68.8%) | 16 (47.1%) | 0.410 |
| **Diarrhoea** | 20 (8.1%) | 13 (6.1%) | 1 (6.3%) | 1 (3.0%) | 0.744 |
| **Nausea** | 27 (10.9%) | 21 (10.0%) | 5 (31.3%) | 1 (3.0%) | 0.042 |
| **Fatigue** | 218 (87.9%) | 147 (69.3%) | 10 (62.5%) | 25 (73.5%) | <0.001 |

Numbers and percentages (in parenthesis) are shown. The statistical comparisons between the four infection groups were performed with the exact test according to Fisher-Freeman-Halton

**Supplemental Table S2:** ICU admission and mortality stratified according to age group and restricted to time periods of previous studies

| **Time period August 2024 – April 2025 (total)** | | | | | |
| --- | --- | --- | --- | --- | --- |
|  | **< 18 years** | | **≥ 18 years** | | |
|  | **n** | **ICU admission** | **n** | **ICU admission** | **Mortality** |
| **Number** | 204 | 5 (2.5%) | 510 | 42 (8.2%) | 51 (10.0%) |
| **SARS-CoV-2** | 41 | 2 (4.8%) | 248 | 20 (8.1%) | 33 (13.3%) |
| **Influenza A** | 46 | 0 (0.0%) | 212 | 18 (8.5%) | 13 (6.1%) |
| **Influenza B** | 44 | 2 (4.5%) | 16 | 1 (6.3%) | 1 (6.3%) |
| **RSV** | 73 | 1 (1.5%) | 34 | 3 (8.8%) | 4 (11.8%) |
| **Time period August 2024 – February 2025 (compare Wiechert et. al., 2024 [3])** | | | | | |
|  | **< 18 years** | | **≥ 18 years** | | |
|  | **n** | **ICU admission** | **n** | **ICU admission** | **Mortality** |
| **Number** | 150 | 4 (2.7%) | 459 | 36 (7.8%) | 45 (9.8%) |
| **SARS-CoV-2** | 41 | 2 (4.9%) | 247 | 20 (8.1%) | 32 (13.0%) |
| **Influenza A** | 38 | 0 (0.0%) | 180 | 13 (7.2%) | 11 (6.1%) |
| **Influenza B** | 40 | 2 (5.0%) | 14 | 1 (7.1%) | 1 (7.1%) |
| **RSV** | 31 | 0 (0.0%) | 18 | 2 (11.1%) | 1 (5.6%) |
| **Time period October 2024 – February 2025 (compare Quark et. al., 2023 [4])** | | | | | |
|  | **< 18 years** | | **≥ 18 years** | | |
|  | **n** | **ICU admission** | **n** | **ICU admission** | **Mortality** |
| **Number** | 127 | 3 (2.4%) | 359 | 28 (7.8%) | 33 (9.2%) |
| **SARS-CoV-2** | 18 | 1 (5.6%) | 147 | 12 (8.2%) | 20 (13.6%) |
| **Influenza A** | 38 | 0 (0.0%) | 180 | 13 (7.2%) | 11 (6.1%) |
| **Influenza B** | 40 | 2 (5.0%) | 14 | 1 (7.1%) | 1 (7.1%) |
| **RSV** | 31 | 0 (0.0%) | 18 | 2 (11.1%) | 1 (5.6%) |

Numbers and percentages (in parenthesis) are shown. Mortality refers to in-hospital mortality. In Patients of age <18 years, mortality was always zero. ICU = Intensive Care Unit. The table demonstrates that the results did not critically depend on the time window chosen for analysis

**Supplemental Table S3:** Vital parameters, blood gases and selected laboratory parameter upon admission in patients ≥ 18 years of age

|  | **SARS-CoV-2** | **Influenza A** | **Influenza B** | **RSV** | **P value** |
| --- | --- | --- | --- | --- | --- |
| **n** | 248 | 212 | 16 | 34 |  |
| **Respiratory rate (/min)** | 20.0 (17.0; 23.0) | 20.0 (17.0; 25.0) | 22.0 (18.0; 26.0) | 22.0 (18.3; 25.8) | 0.037 |
| **Heart rate (/min)** | 83.0 (73.0; 97.0) | 85.0 (73.0; 98.0) | 99.5 (75.0; 108.3) | 89.5 (72.8; 103.0) | 0.226 |
| **Temperature (oC)** | 37.5 (36.9; 38.4) | 37.8 (36.8; 38.8) | 38.2 (37.4; 39.0) | 37.4 (36.9; 38.5) | 0.252 |
| **Oxygen saturation (SpO2) (%)** | 94.0 (92.0; 96.0) | 94.0 (90.0; 96.0) | 95.0 (93.2; 97.0) | 93.0 (89.0; 96.0) | 0.101 |
| **Blood pressure systolic (mmHg)** | 131.0 (114.0; 148.0) | 131.0 (112.3;148.0) | 142.0 (104.8; 152.3) | 135.0 (118.5; 154.5) | 0.674 |
| **Blood pressure diastolic (mmHg)** | 75.0 (66.0; 84.0) | 77.0 (68.0; 86.0) | 88.0 (80.0; 90.0) | 78.5 (68.3; 89.3) | 0.043 |
| **pH** | 7.45 (7.40; 7.48) | 7.43 (7.40; 7.47) | 7.45 (7.40; 7.49) | 7.44 (7.41; 7.46) | 0.320 |
| **pO2 (mmHg)** | 71.1 (62.1; 81.0) | 69.0 (59.4; 85,2) | 80.4 (75.0; 90.1) | 73.3 (61.1; 86.7) | 0.336 |
| **pCO2 (mmHg)** | 33.9 (29.6; 39.5) | 36.5 (32.0; 42.4) | 36.1 (29.8; 39.7) | 35.9 (31.1; 41.8) | 0.023 |
| **eGFR (mL/min)** | 64.0 (40.0; 81.0) | 60.0 (39.0; 80.0) | 81.0 (42.3; 113.3) | 53.0 (30.3; 69.3) | 0.098 |
| **CRP (mg/dL)** | 3.5 (1.0; 9.7) | 3.6 (1.1; 7.2) | 3.5 (1.1; 12.6) | 4.3 (2.0; 11.3) | 0.577 |
| **D-dimers (µg/L)** | 1080 (640; 2510) | 855 (510; 1723) | 980 (475; 2595) | 630 (433; 2035) | 0.394 |

Median values and quartiles (in parentheses) are given. Statistical comparisons between the infection groups were performed with the Kruskal-Wallis test. SpO2 = peripheral oxygen saturation, pO2 = arterial pressures of oxygen, pCO2 = arterial pressures of carbon dioxide, CRP = C-reactive protein, eGFR = glomerular filtration rate estimated via creatine

**Supplemental Table S4** Comparison of in hospital mortality in the past three seasons in patients ≥ 18 years of age

|  | **Percent mortality** | | | | | |
| --- | --- | --- | --- | --- | --- | --- |
| **Seasons** | 2022/2023 [4] | 2023/2024 [3] | | 2024/2025 | | |
| **Time window** | Oct-Feb | Aug-Feb | Oct-Feb | Aug-Apr | Aug-Feb | Oct-Feb |
| **SARS-CoV-2** | 9.0% (35) | 8.8% (38) | 9.0% (31) | 13.3% (33) | 13.0% (32) | 13.6% (20) |
| **Influenza A** | 8.0% (10) | 8.6% (14) | 8.6% (14) | 6.1%(13) | 6.1% (11) | 6.1% (11) |
| **RSV** | 11.1% (11) | 20.0% (7) | 20.0% (7) | 11.8%(4) | 5.6% (1) | 5.6% (1) |

Comparison of Mortality rates in the past three seasons. Values are given for the total time window analyzed for each season, as well as restricted time windows stratified to time periods of previous studies (October-February; August-February); shown in percentages and absolute numbers (in parenthesis) (Quark et. al., 2023, [4]) (Wiechert et. al., 2024, [3]) (present study)
